# Supplementary material for: Cartilage Acidic Protein a Novel Therapeutic Factor to Improve Skin Damage Repair?
Source: MDPI journal article supplement (doi:10.3390/md19100541), 2021-09-25

## Supplementary Figures

**Figure S1** - SJD.1 cells growth curve in DMEM normal medium counted every other day over 15 days using an haematocytometer under normal conditions (8 % CO<sub>2</sub>, and 28 °C).

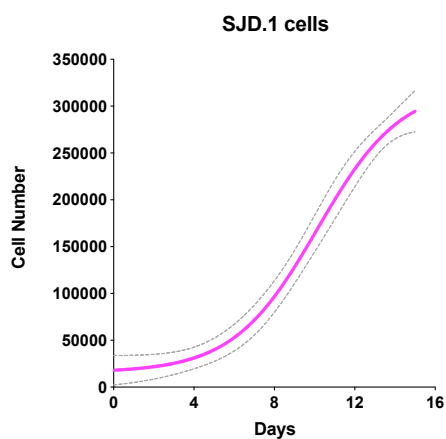

**Figure S2** - Immunofluorescent photos of SJD.1 cells in normal conditions. SJD.1 cells were labelled with a monoclonal anti- $\alpha$ -tubulin antibody detected with a IgG Secondary antibody ( $\alpha$ -tubulin in green (b)), stained with Texas Red®-X Phalloidin (actin in red (c)) and DAPI (nuclei in blue (a)) and all images merged (d). Images were obtained Leica DM IL microscope coupled to a Visicam PRO 20C digital camera and photographs were analyzed using ImageJ software for image overlay. Scale bars indicate 100  $\mu$ m.

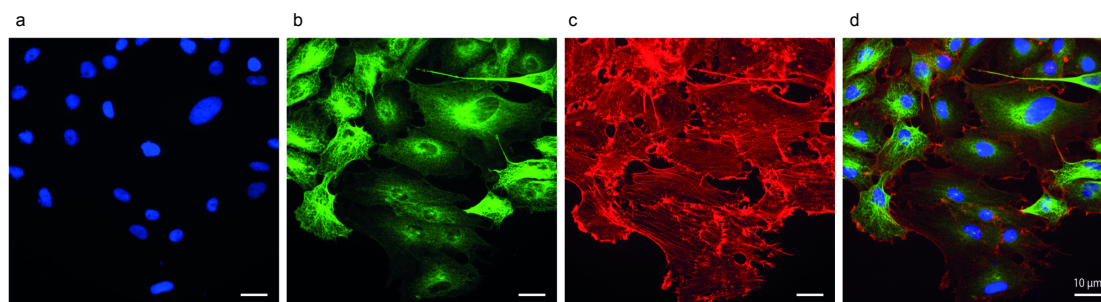

**Figure S3** - Images showing the result of the optimized wounding/ scratching protocol. Images of a single 250  $\mu\text{M}$  circular electrode before (confluent SJD.1 cell monolayer (left)) and after (empty electrode (right)) of the optimized current pulse (1200  $\mu\text{A}$ , 40 kHz, 10 s) generated by the ECIS equipment.

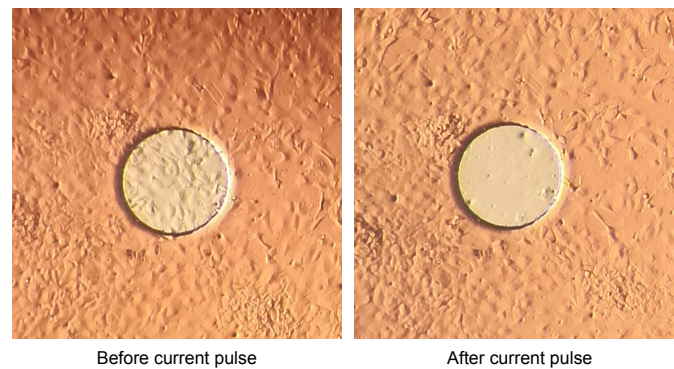

**Figure S4** - Schematic representation of the scratch performed in the SJD.1 fibroblast monolayers to achieved multiple scratches that corresponded approximately to a scratch involving 50 % of the cells.

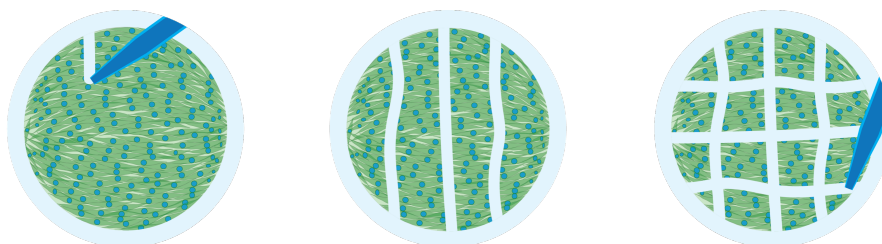

**Figure S5** - Schematic representation of an 8W1E devices (IBIDI) used for cell migration ECIS assays with a single 250  $\mu\text{M}$  circular electrode covered in a thin gold film.

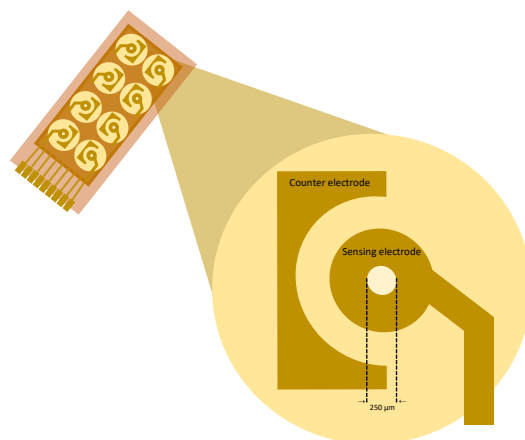

Supplement: s1 [file s1]
